# Supplementary material for: Architectures varying from discrete molecular units to 2-dimensional coordination polymers and photoluminescence behavior of zinc and cadmium comprising an anionic zwitterion of rigid 4,5-dicarboxy-1,3-dimethyl-1H-imidazolium iodide
Source: Royal Society of Chemistry journal article supplement (doi:10.1039/c4ce02215g), 2015-01-01
Supplement: c4ce02215g1.pdf [file c4ce02215g1.pdf]

## **Electronic Supplementary Information (ESI)**

**Architectures Varying from Discrete Molecular Units to 2-Dimensional Coordination Polymers and Photoluminescent Behavior of Zinc and Cadmium Comprising of Anionic Zwitter ion of Rigid 4,5-Dicarboxy-1,3-dimethyl-1H-imidazolium iodide**

Sarita Tripathi and Ganapathi Anantharaman\*

Department of Chemistry, Indian Institute of Technology Kanpur, Kanpur-208016, India

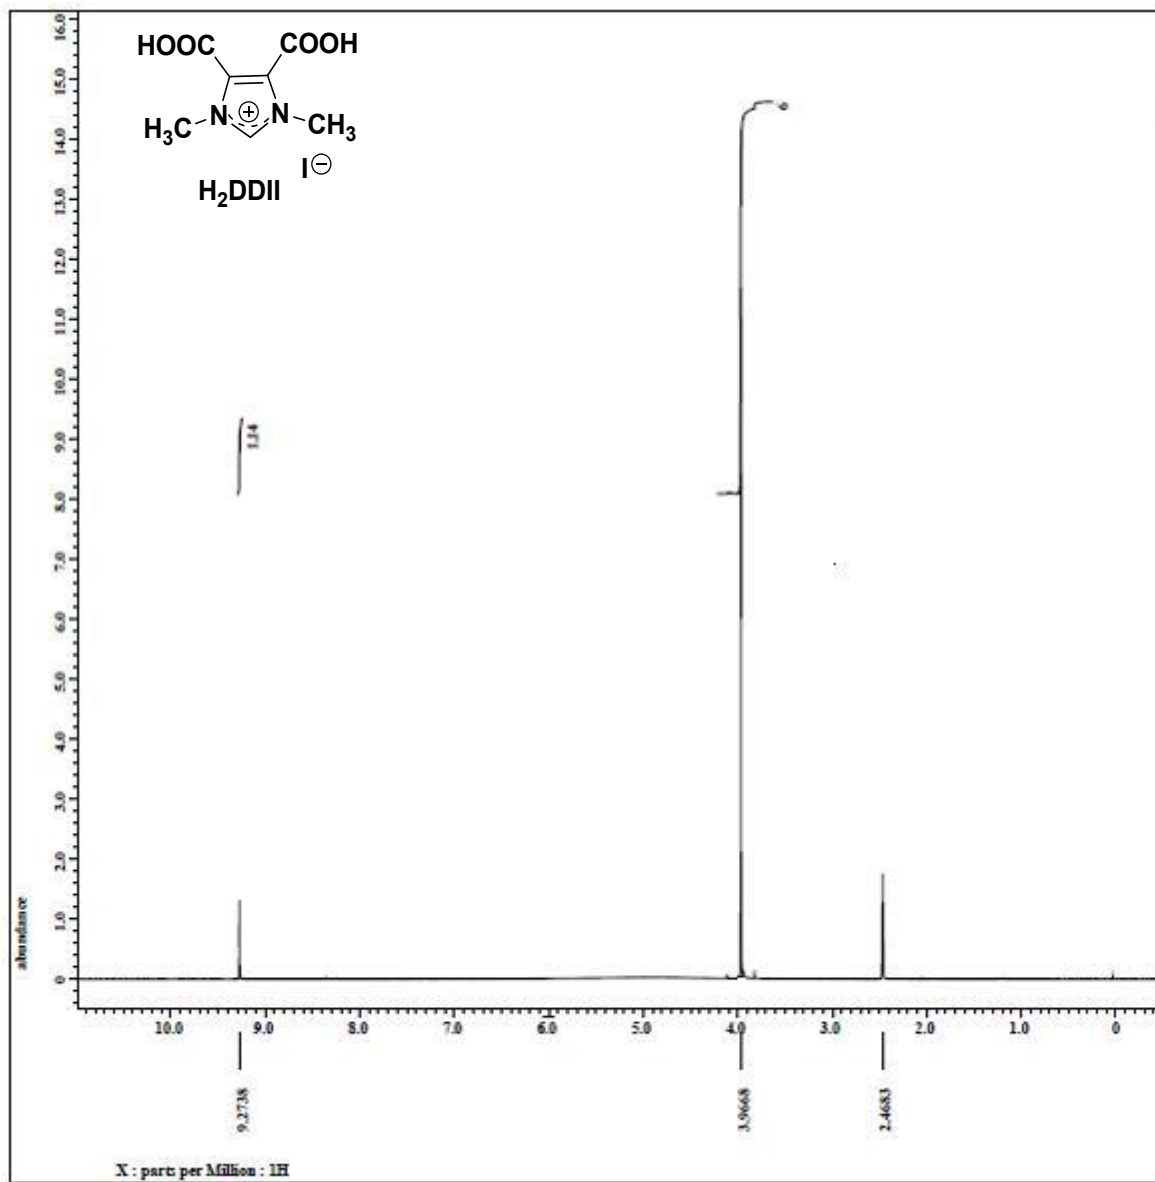

Figure S1. <sup>1</sup>H-NMR of H<sub>2</sub>DDII recorded in DMSO-d<sub>6</sub>

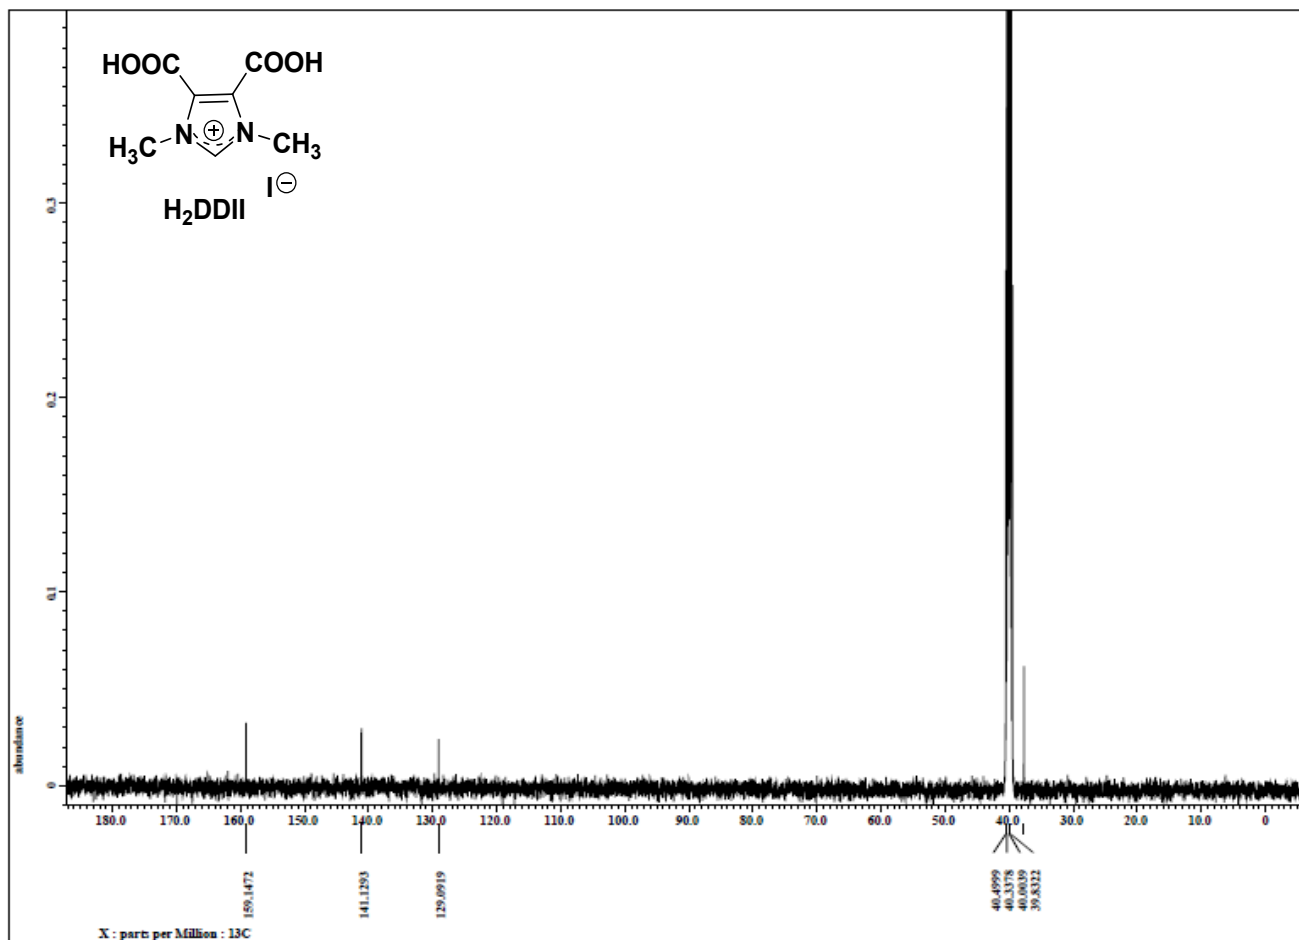

Figure S2.  $^{13}\text{C}$ -NMR of  $\text{H}_2\text{DDII}$  recorded in  $\text{DMSO-d}_6$

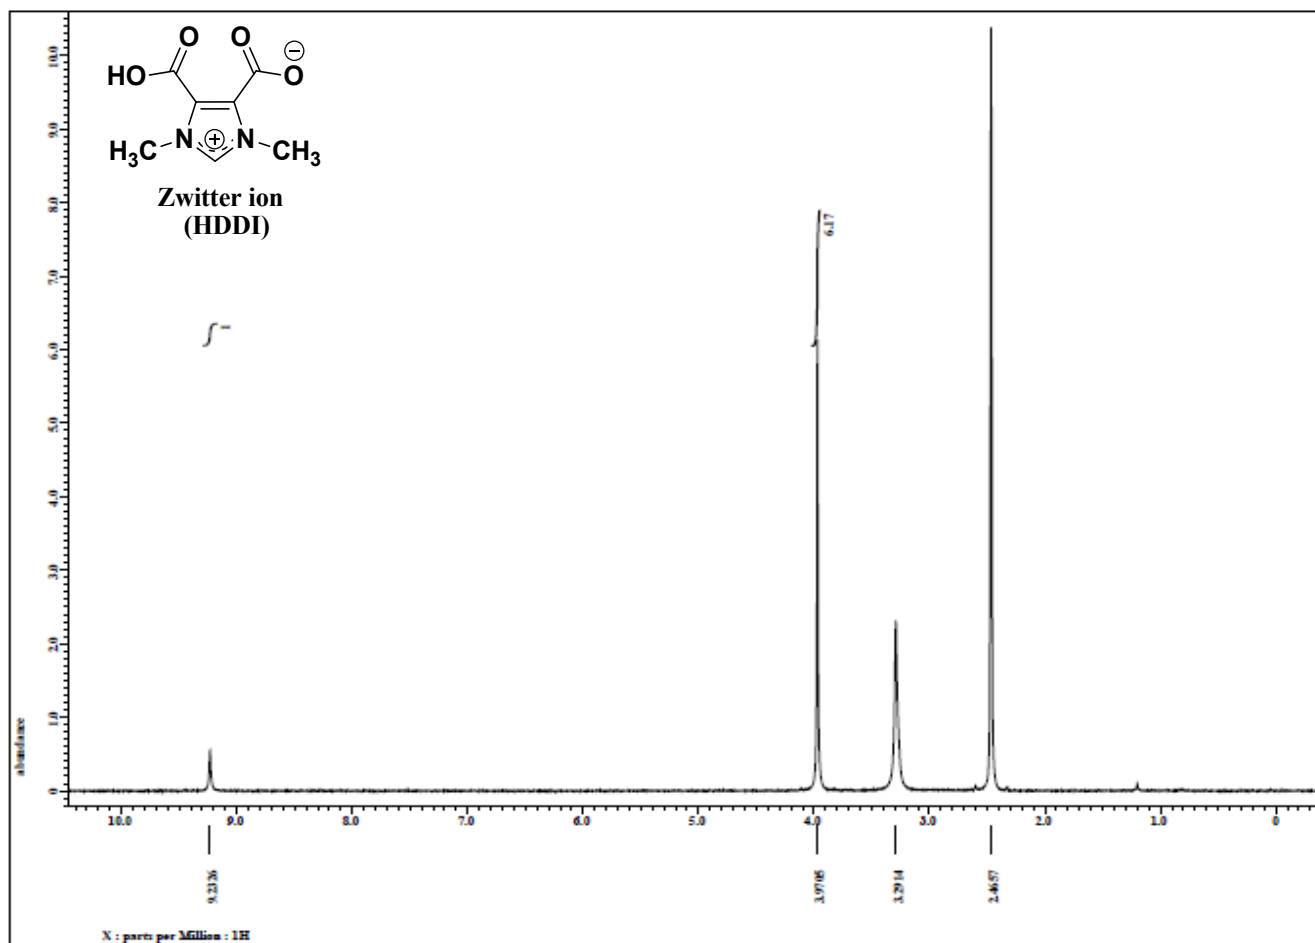

Figure S3. <sup>1</sup>H-NMR of HDDII (1) recorded in DMSO-d<sub>6</sub>

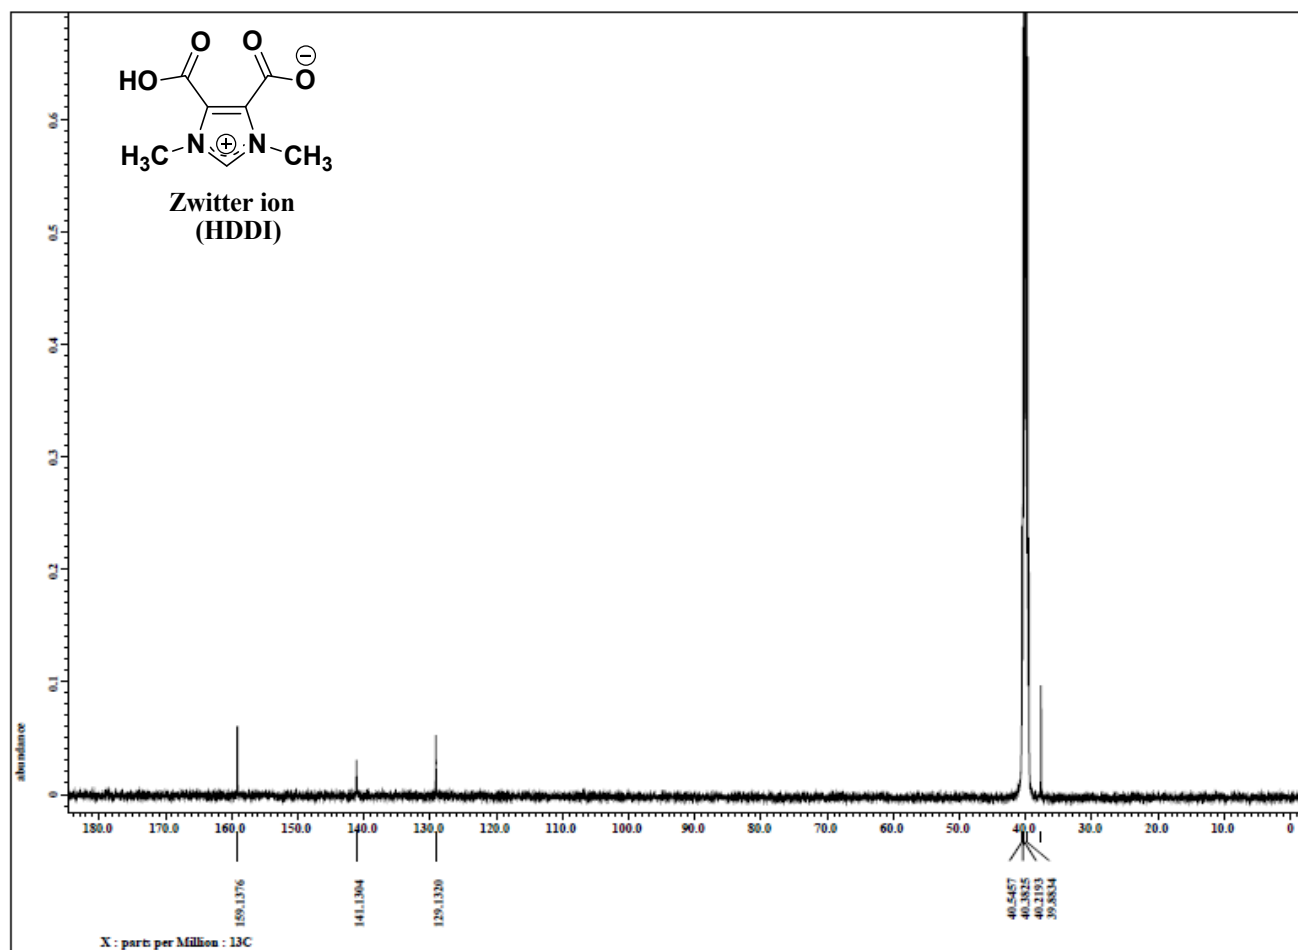

Figure S4.  $^{13}\text{C}$ -NMR of HDDII (1) recorded in  $\text{DMSO-d}_6$

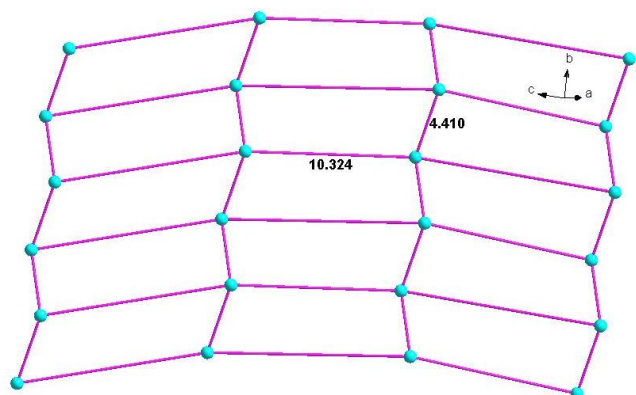

**Figure S5.** Distance between Zn···Zn in **2**.  
between

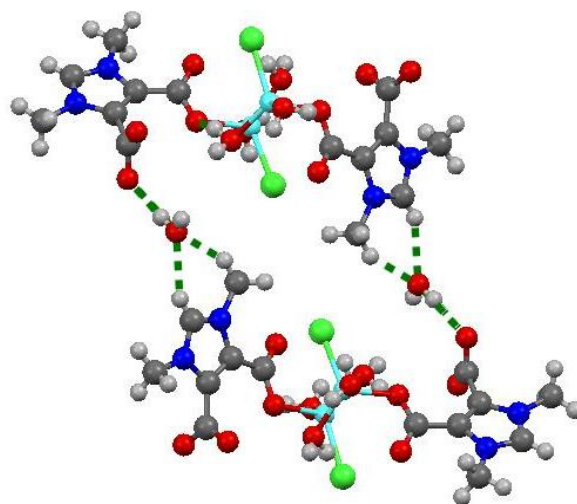

**Figure S6.** H-bonding interactions  
lattice water molecules and two adjacent  
rectangular sheets in **2**.

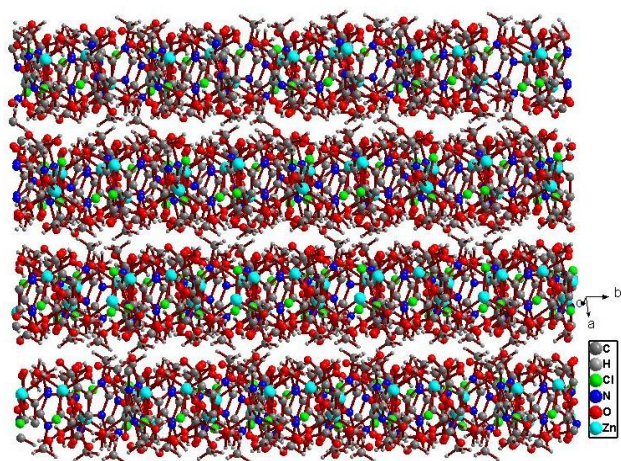

**Figure S7.** 3D supramolecular structure of **2**.

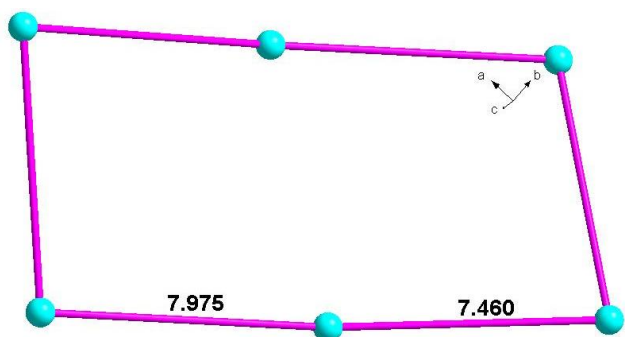

**Figure S8.** Distance between Zn···Zn in one macrocycle in **3**.

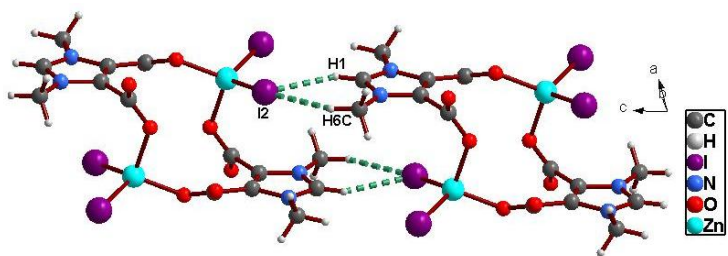

**Figure S9.** H-bonding interactions in 4.

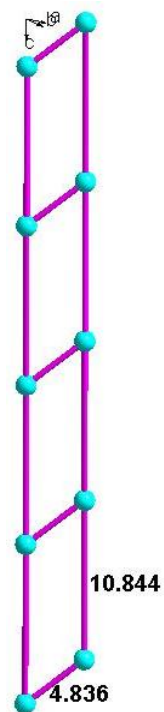

**Figure S10.** Distance between Zn...Zn in 4.



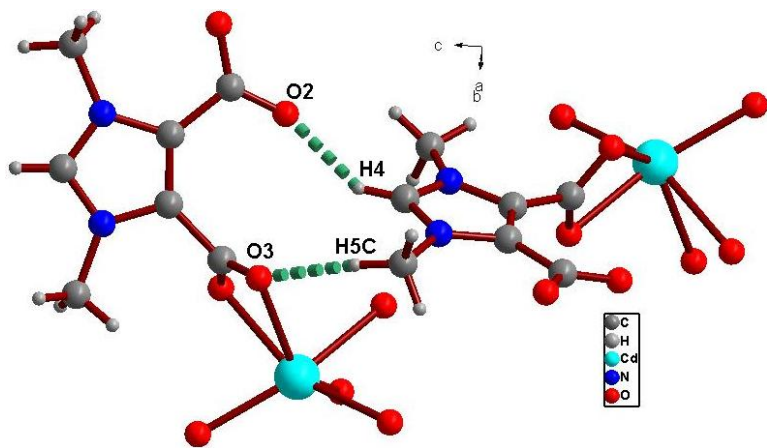

**Figure S11.** CH...O interaction in **6**.

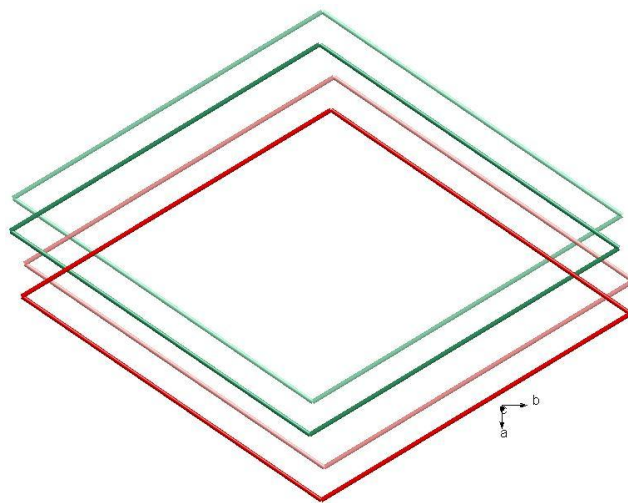

**Figure S12.** 3D ABAB packing fashion in **6**.

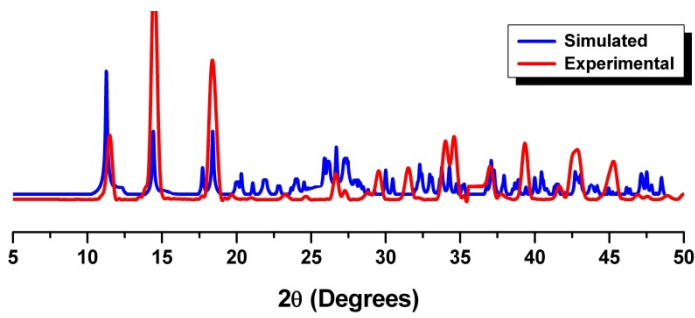

PXRD of compound 1

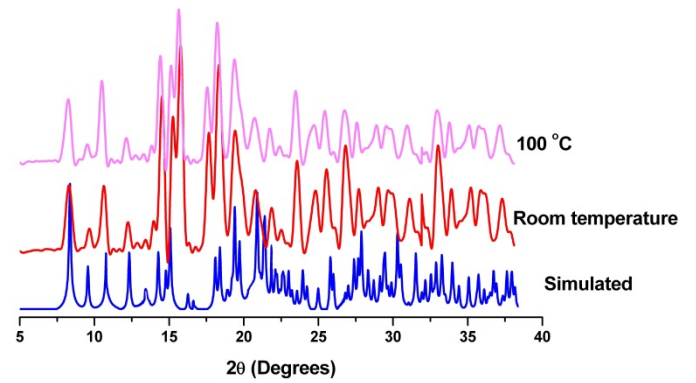

PXRD of compound 2

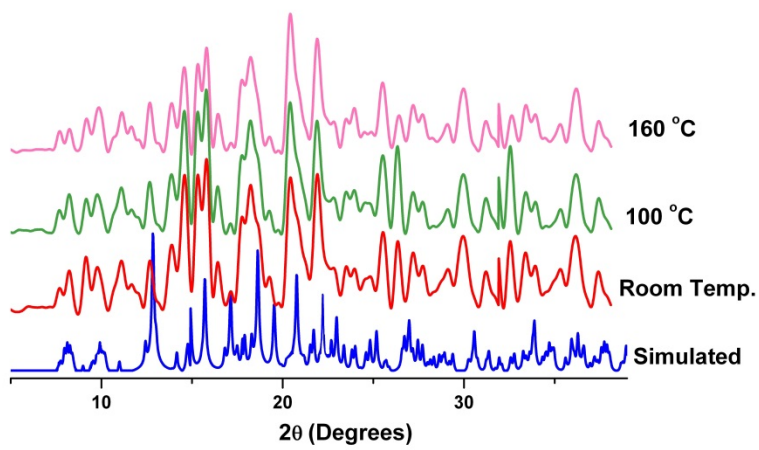

PXRD of CP 3

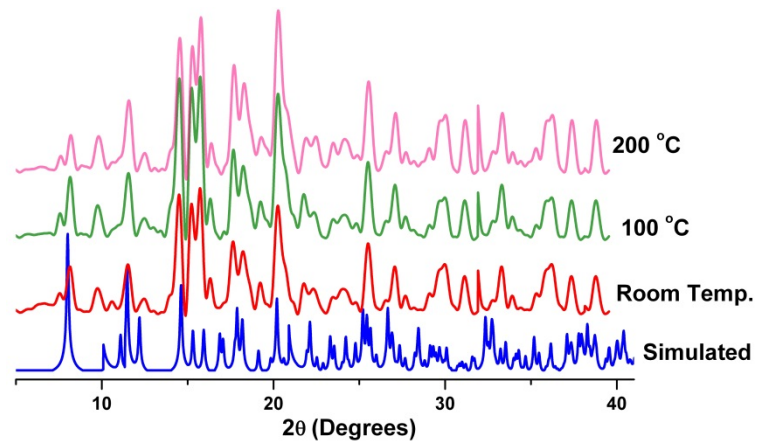

PXRD of compound 4

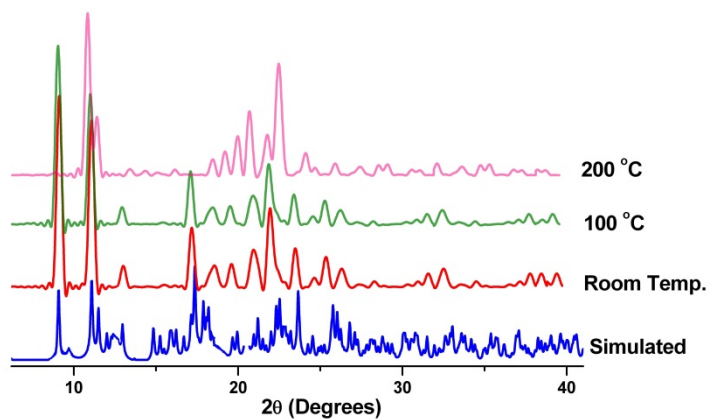

PXRD of compound 5

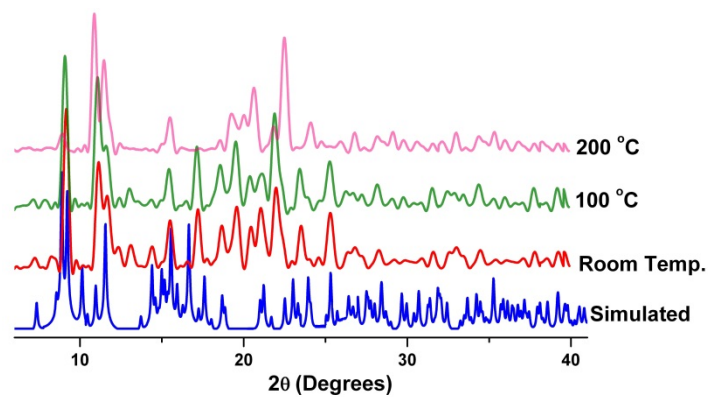

PXRD of CP 6

Figure S13. PXRD of compounds 1-6

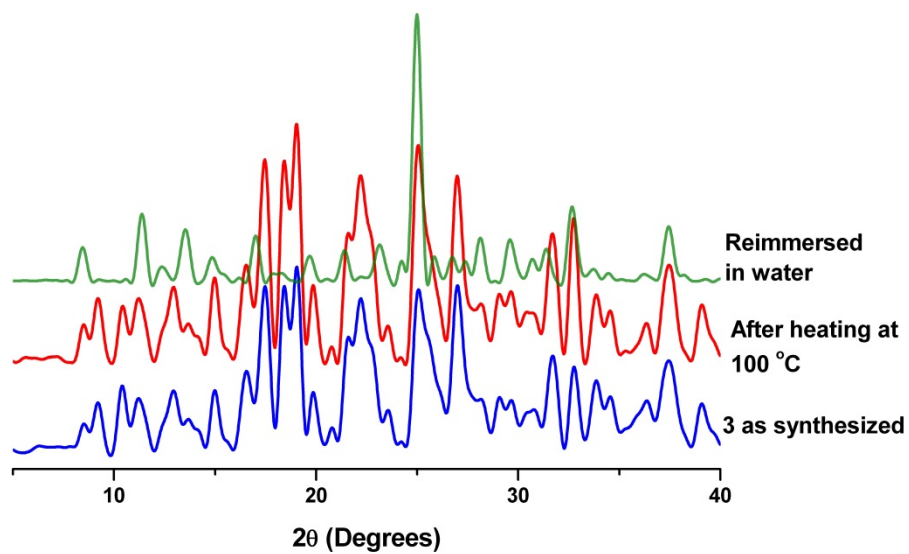

Figure S14. Irreversible water removal in CP 3
